# Supplementary material for: Animal model of intrahepatic metastasis of hepatocellular carcinoma: establishment and characteristic
Source: PubMed Central journal article supplement (PMC7494875; doi:10.1038/s41598-020-72110-7), 2020-09-16
Supplement: 41598_2020_72110_MOESM1_ESM.pdf [file 41598_2020_72110_MOESM1_ESM.pdf]

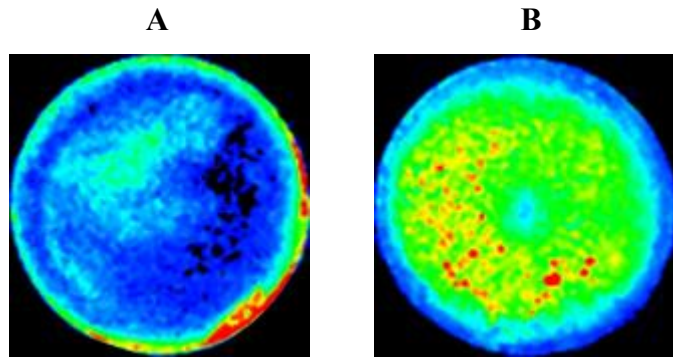

**Figure 1.** Aioluminescence and luciferase assay of HCC cell lines. (A) PLC/PRF/5 cell line. (B) MHCC97-H cell line.

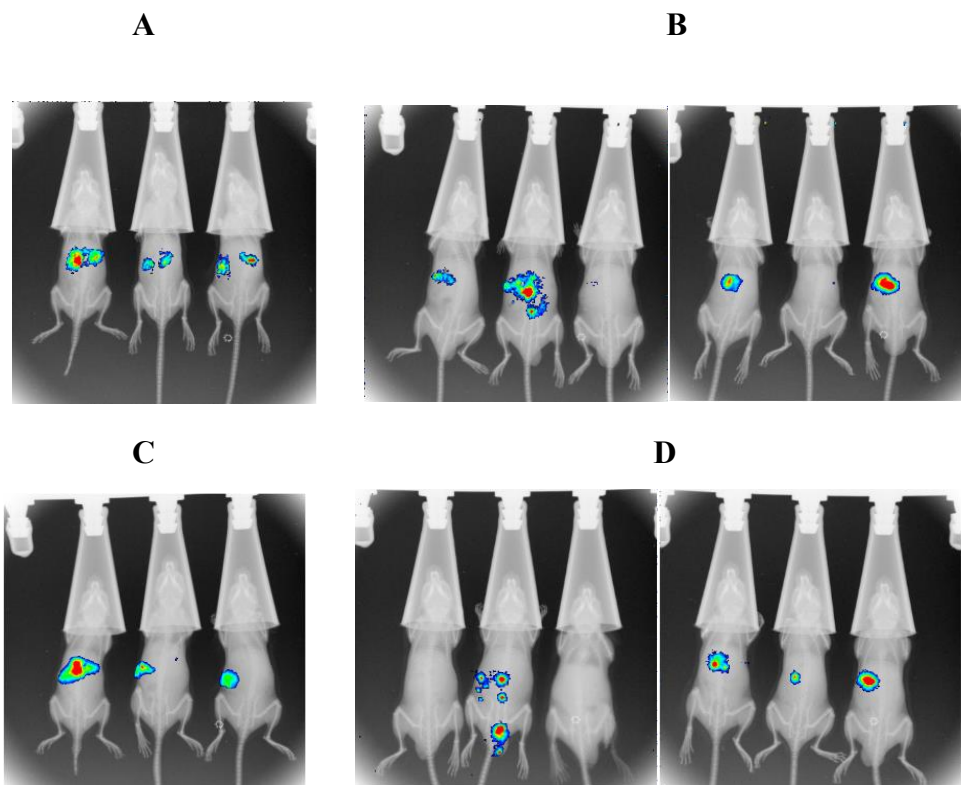

**Figure 2.** In vivo Bioluminescence assay after operation. (A-B) PLC/PRF/5 and MHCC97-H groups on the 4day post-operation respectively. (C-D) PLC/PRF/5 and MHCC97-H groups on the 14day post-operation respectively.

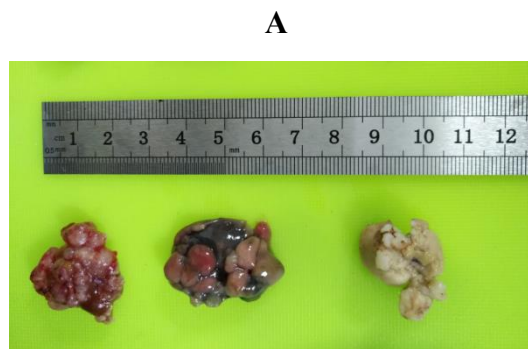

**A**

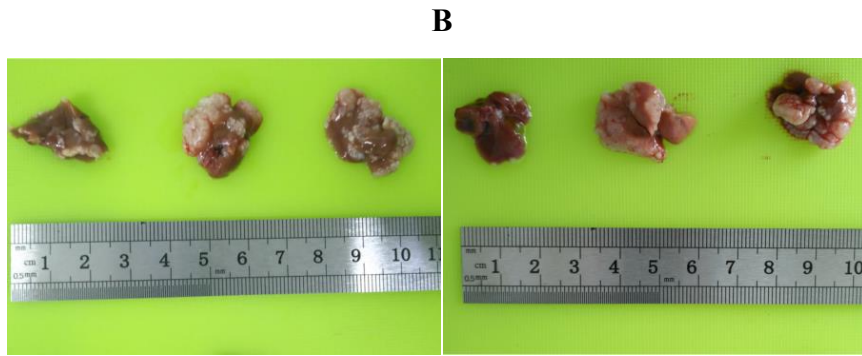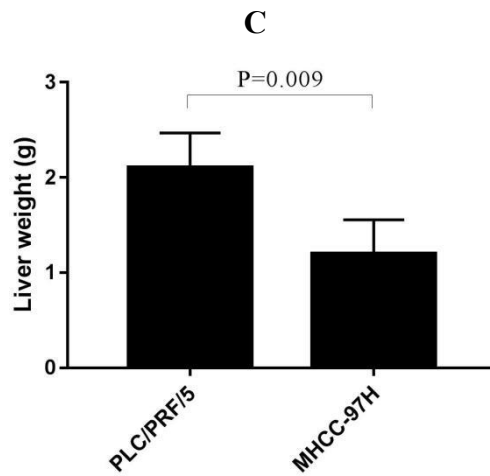

**Figure 3.** Intrahepatic metastasis of Hepatocellular carcinoma. **(A)** Intrahepatic metastasis lesions of PLC/PRF/5 group. **(B)** Intrahepatic metastasis lesions of MHCC97-H group. **(C)** Comparison of liver weight between two groups.

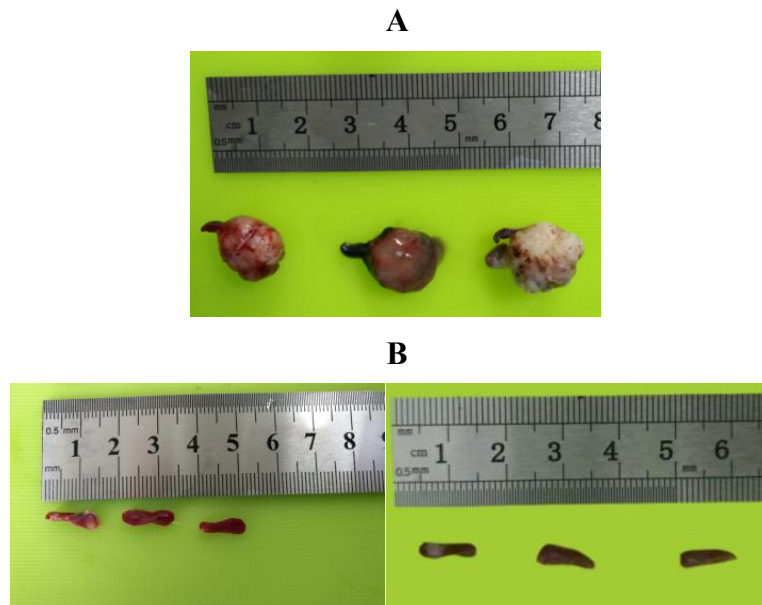

**Figure 4.** Carcinoma in situ of spleen. **(A)** Spleen orthotopic tumor of PLC/PRF/5 group. **(B)** Spleen orthotopic tumor of MHCC97-H group.
